# Supplementary material for: Reevaluating Prednisolone Use in Adults ≥ 70 years With Myasthenia Gravis: Insights From a Retrospective Cohort Study
Source: Research Square preprint supplement (doi:10.21203/rs.3.rs-7326984/v1), 2025-09-08
Supplement: Supplementary file 1 [file 34d45d1ed9e194f8c86f3e9c.docx]

Additional file 1. Detailed Inforamtion of Patients with Myasthenia Gravis over 70 years

|  | No | age | sex | MGFA | Thymoma | Duration of admission | AChR Ab （nM） | PSL maximum dosage (mg/AD) | CNIs | FT | PB at discharge | Reasons for PSL avoidance | Underlying and Pre-existing conditions | Medications for underlying conditions | | | | | |
| --- | --- | --- | --- | --- | --- | --- | --- | --- | --- | --- | --- | --- | --- | --- | --- | --- | --- | --- | --- |
| PPI/H2 receptor antagonist | For osteoporosis | For HT | For HL | For DM | Other Medications |
| PSL+CNIs group | 1 | 70 | M | IIa |  | 27 | 10.1 | 30 | CY |  | PB |  | Hypothyroidism Left kidney donation | Esomeprazole | Alendronate Sodium Hydrate |  |  |  | Sulfamethoxazole/Trimethoprim |
| 2 | 70 | M | IIa |  | 54 | 0.9 | 30 | TA | IAPP |  |  | HT Multiple cerebral infarction past HBV infection | Esomeprazole | Alendronate Sodium Hydrate Menatetrenone | Amlodipine |  |  | Sulfamethoxazole/TrimethoprimCilostazol |
| 3 | 73 | F | IIa |  | 70 | 18.7 | 20 | TA |  |  |  | HT HL | Rabeprazole | Alendronate Sodium Hydrate | Telmisartan |  |  | Difenidol |
| 4 | 73 | M | IIIb | B2 | 82 | 43.6 | 30 | TA | DFPP IVIg |  |  | HT Prostatic cancer  past HBV infection MCI | Esomeprazole | Eldecalcitol | Nifedipine |  |  | Sulfamethoxazole/Trimethoprim Bicalutamide Imidafenacin Olanzapine Entecavir |
| 5 | 75 | F | IIa |  | 85 | 24.4 | 25 | TA |  | PB |  | Regurgitation esophagitis Osteoporosis HL | Rabeprazole | Alendronate Sodium Hydrate |  | Simvastatin |  |  |
| 6 | 78 | M | IIIb |  | 42 | 39 | 30 | TA | PE |  |  | RS3PE DM HL Cerebral infarction Sleep apnea | Esomeprazole | Alfacalcidol、Menatetrenone | Nifedipine | Ravastatin | Metformin | Sulfamethoxazole/Trimethoprim Cilostazol |
| 7 | 79 | M | Iib |  | 80 | 27.3 | 30 | CY |  | PB |  | DM CKD HT HL hyperuricemia Glaucoma BPH | Rabeprazole | Alendronate Sodium Hydrate | Nicardipine Irbesartan |  | Linagliptin | Sulfamethoxazole/Trimethoprim Bethanechol  Tamsulosin  Benzbromarone |
| CNIs group | 8 | 74 | F | IIa |  | 63 | 25.3 |  | TA |  |  | underlying conditions | DM HL severe obesity Fatty liver Osteoporosis OA |  | Alendronate Sodium Hydrate |  | Simvastatin | Sitagliptin, Glimepiride, Pioglitazone, Voglibose | Ebastine Proheparum Rebamipide |
| 9 | 79 | F | IIb |  | 33 | 52.4 |  | TA | IAPP | PB | underlying conditions | Osteoporosis Fraction of femoral neck Glaucoma IGT HL DVT | Rabeprazole | Alfacalcidol |  | Atorvastatin |  | beraprost |
| 10 | 82 | F | I |  | 38 | 10.8 |  | TA |  | PB | aging, low back pain | Cerebral aneurysm MCI Chronic brochitis Lumber spondylosis |  |  |  | Atorvastatin |  | Pregabalin Montelukast |
| 11 | 84 | F | IIa |  | 42 | 25.2 |  | TA |  |  | underlying conditions | Osteoporosis Compressin fractures of L1 and L4 MCI Fatty liver past infection of tuberculosis | Famotidine | Sodium Risedronate Hydrate Alfacalcidol |  |  |  | Aspirin Acetaminophen |
| 12 | 85 | F | IIa |  | 30 | 16.4 |  | TA |  | PB | aging | HT past HBV infection Osteoporosis Lumber spondylosis |  |  | Amlodipine Valsartan |  |  | Montelukast  Mirabegron |

PSL, prednisolone; CNIs, calcineurin inhibitors; M, male; F, female; MGFA, myasthenia Gravis of Foundation of America; AChR Ab; acetylcholine receptor antibodies; CY, Cyclosporine; TA, Tacrolims; FT, early fast-acting treatments ; IVIg, intravenous immunoglobulin; IAPP, immunoadsorption plasmapheresis; DFPP, double filtration plasmapheresis; PE, plasma exchange; PB, pyridostigmine bromide ; HT, hypertension; HL, hyperlipidemia; HBV, hepatis B virus; MCI, mild cognitive impairment. DM, diabetes mellitus; RS3PE, remitting seronegative symmetrical synovitis with pitting edema; CKD, chronic kidney disease; BPH, benign prostatic hyperplasia; OA, osteoarthritis; IGT, impaired glucose tolerance; DVT, deep vein thrombosis; PPI, proton pomp inhibitor.
