# Supplementary material for: Reevaluating Prednisolone Use in Adults ≥ 70 years With Myasthenia Gravis: Insights From a Retrospective Cohort Study
Source: Research Square preprint supplement (doi:10.21203/rs.3.rs-7326984/v1), 2025-09-08
Supplement: Supplementary file 2 [file 80724a3ebee192a0df621d78.docx]

**Supplemental Figure 1A.** Violin plots with MG-ADL score at admission and at discharge in both groups.

Statistical analysis of multiple comparisons was performed the False Discovery Rate (FDR) approach after one-way ANOVA.

The confidence line showed medians, and dot lines showed the 25th and 75th quantiles.


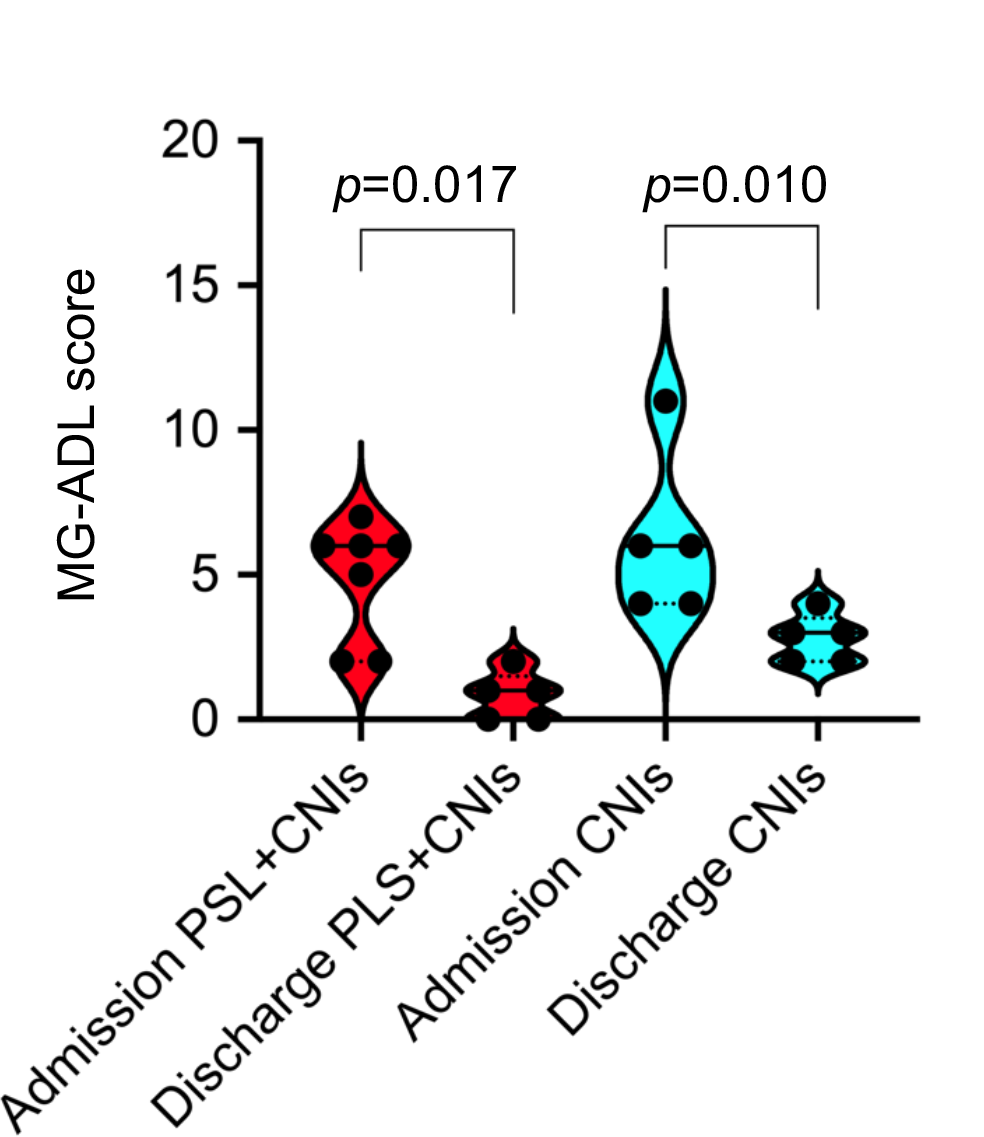


**Supplemental Figure 1B.** Violin plots with QMG score at admission and at discharge in both groups.

Statistical analysis of multiple comparisons was performed the False Discovery Rate (FDR) approach after one-way ANOVA.


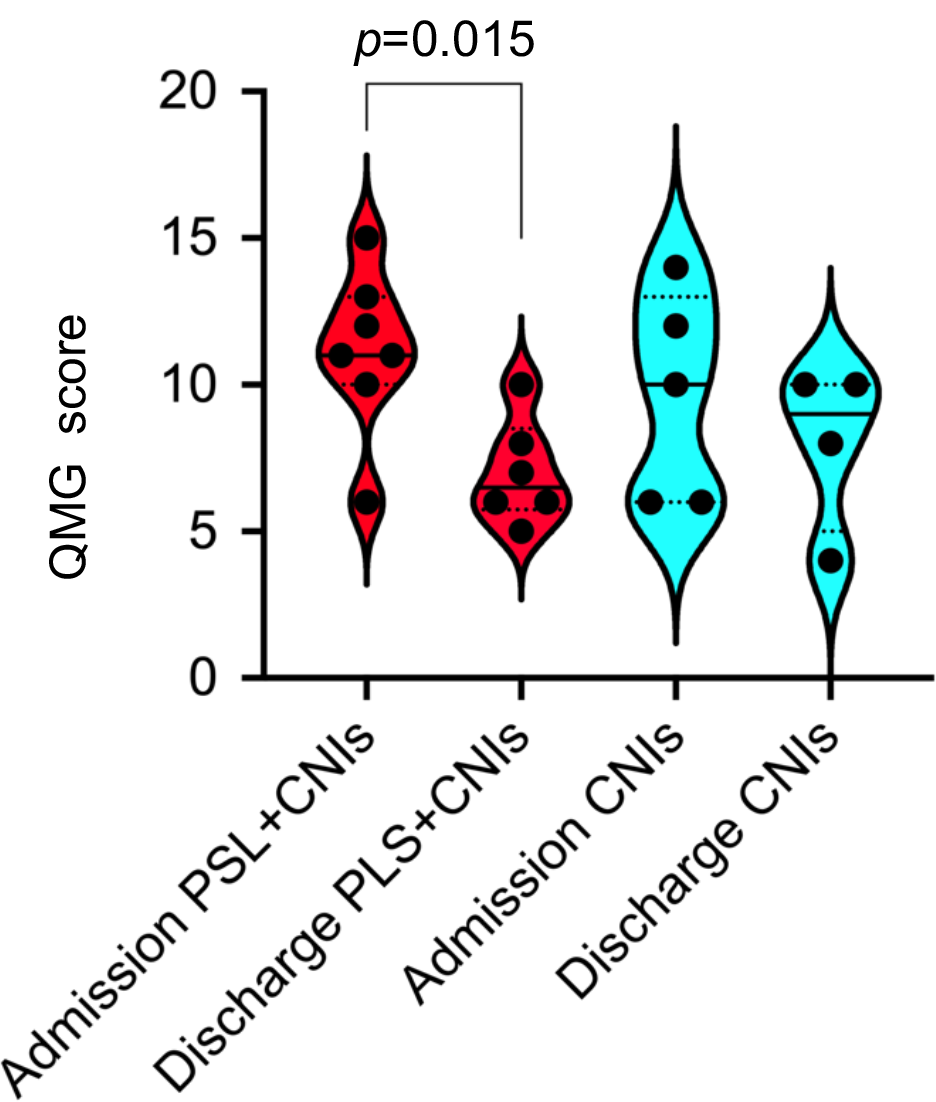
The middle line showed medians, and the dot lines showed the confidence of 25th and 75th quantiles.
